# Supplementary material for: Selective Th(iv) capture from a new metal–organic framework with O− groups
Source: Royal Society of Chemistry journal article supplement (doi:10.1039/c9dt04912f), 2020-01-01
Supplement: c9dt04912f1.pdf [file c9dt04912f1.pdf]

***Selective Th(IV) capture from a new metal-organic framework with O-  
groups***

**Supporting information**

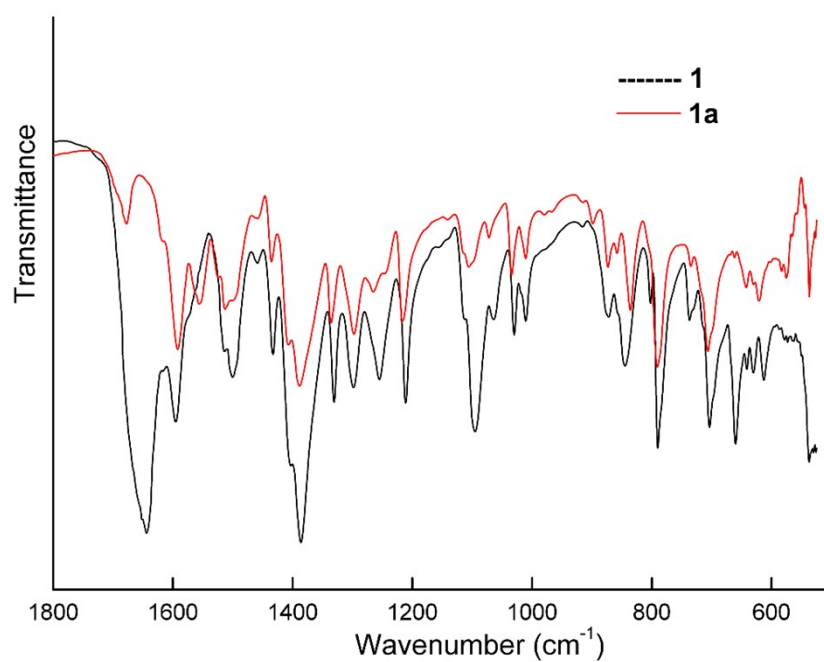

Figure S1. IR spectrum of compound **1** and **1a**.

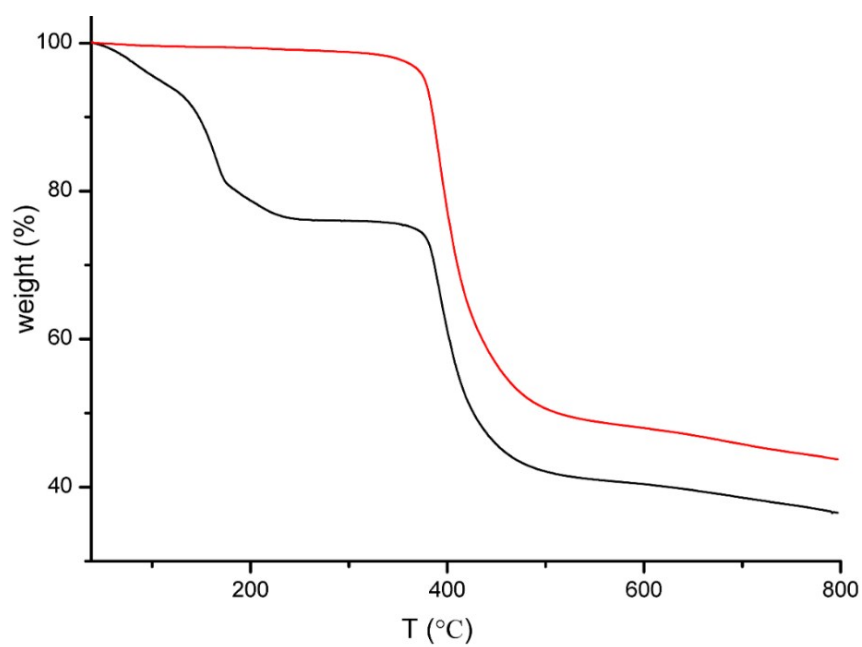

Figure S2. TGA curves for compound **1** (black line) and corresponding activated samples (red line).

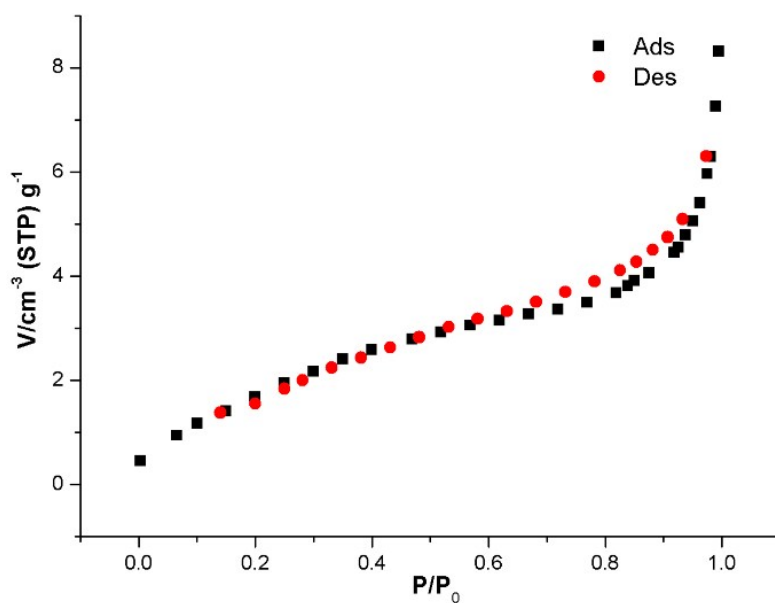

Figure S3. The N<sub>2</sub> adsorption isotherms of **1a** at 77K.

The pseudo-first-order and pseudo-second-order fits were conducted according to the following equation:

$$\log(q_e - q_t) = \log q_e - \left(\frac{k_1}{2.303}\right)t$$

$$\frac{t}{q} = \frac{1}{k_2 q_e^2} + \frac{t}{q_e}$$

where  $q_e$  and  $q_t$  stands for the adsorption capacities at equilibrium and at time  $t$ ,  $k_1$  and  $k_2$  represents the rate constant of pseudo-first-order and pseudo-second-order model.

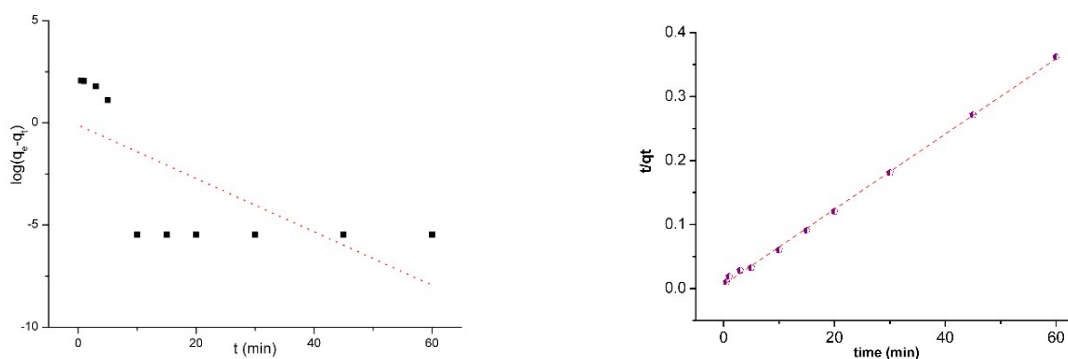

Figure S4. Linear fitting for a pseudo-first-order model (left) and a pseudo-second-order model (right)

**Table S1** Pseudo-first-order and pseudo-second-order fits parameter.

| Experiment<br>$q_e$ ( $\text{mg g}^{-1}$ ) | Pseudo-first-order model        |                                |       | Pseudo-second-order model       |                                               |       |
|--------------------------------------------|---------------------------------|--------------------------------|-------|---------------------------------|-----------------------------------------------|-------|
|                                            | $q_e$<br>( $\text{mg g}^{-1}$ ) | $k_1$<br>( $\text{min}^{-1}$ ) | $R^2$ | $q_e$<br>( $\text{mg g}^{-1}$ ) | $k_2$<br>( $\text{g mg}^{-1} \text{h}^{-1}$ ) | $R^2$ |
| 165.60                                     | 0.77                            | 0.30                           | 0.44  | 170.06                          | 0.34                                          | 0.99  |

The linear equation of the Langmuir isotherm model is expressed as followed:

$$\frac{c_e}{q_e} = \frac{1}{q_m k_L} + \frac{c_e}{q_m}$$

where  $q_m$  is the maximum adsorption of the absorbent and  $k_L$  is the Langmuir constant ( $L\ mg^{-1}$ ). The values of  $q_m$  and  $k_L$  can be calculated from  $c_e/q_e$  versus  $c_e$  plot.

The linear equation of Freundlich model can be express by:

$$\log q_e = \log k_F + \frac{1}{n} \log c_e$$

where  $k_F$  and  $n$  are the Freundlich constants related to the adsorption capacity and intensity.

**Table S2** Isotherm parameters of Langmuir and Freundlich models for the adsorption of Th(IV) by **1a**.

| Experiment          | Langmuir                  |                           |       | Freundlich                |      |       |
|---------------------|---------------------------|---------------------------|-------|---------------------------|------|-------|
| $q_m\ (mg\ g^{-1})$ | $q_m$<br>( $mg\ g^{-1}$ ) | $k_L$<br>( $L\ mg^{-1}$ ) | $R^2$ | $k_F$<br>( $mg\ g^{-1}$ ) | $n$  | $R^2$ |
| 165.60              | 167.5                     | 10.0                      | 0.98  | 158.48                    | 8.43 | 0.59  |

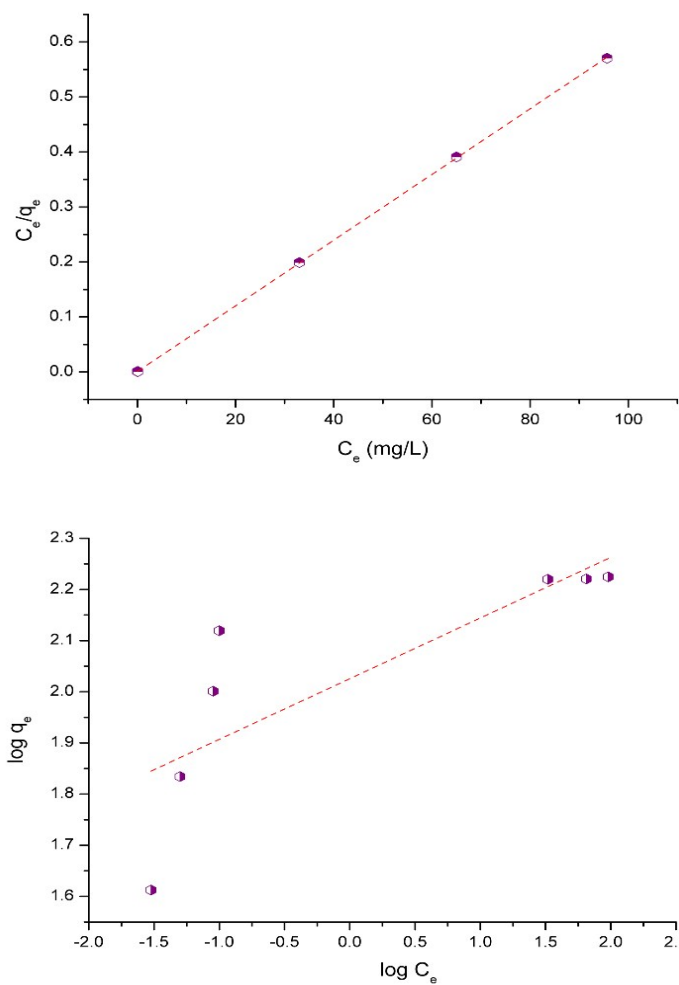

Figure S5. Linear fitting for the Langmuir model (top) and Freundlich model (down).

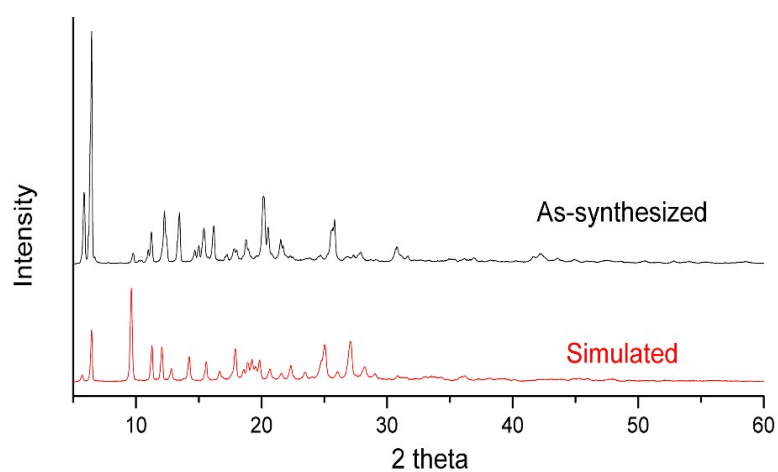

Figure S6. PXRD for synthesized **1** and its simulated pattern.

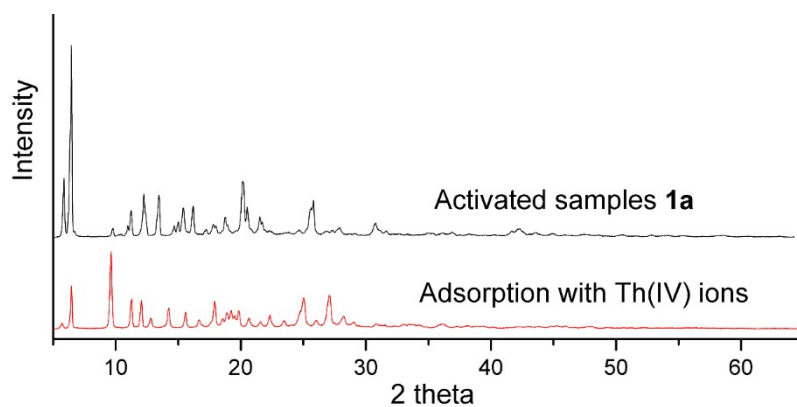

Figure S7. PXRD for the activated sample **1a** and after Th(IV) adsorptions with initial concentration of 100 ppm.

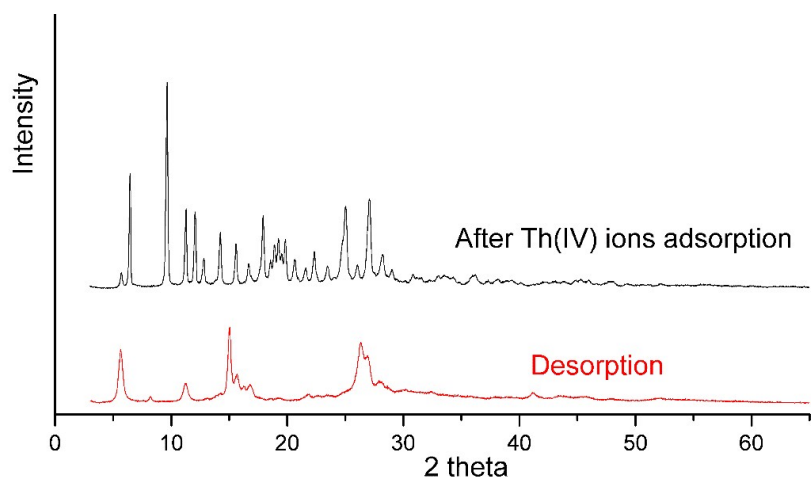

Figure S8. PXRD for samples with adsorption of Th(IV) ions and desorption.
